# Supplementary material for: Patient-Derived Cells to Guide Targeted Therapy for Advanced Lung Adenocarcinoma
Source: Sci Rep. 2019 Dec 27;9:19909. doi: 10.1038/s41598-019-56356-4 (PMC6934824; doi:10.1038/s41598-019-56356-4)
Supplement: Supplementary file 1 — Supplementary Figures and Tables [file 41598_2019_56356_MOESM1_ESM.pdf]

## Patient-Derived Cells to Guide Targeted Therapy for Advanced Lung Adenocarcinoma

Seok-Young Kim<sup>a,b</sup>, Ji Yeon Lee<sup>b</sup>, Dong Hwi Kim<sup>a,b</sup>, Hyeong-Seok Joo<sup>a,b</sup>, Mi Ran Yun<sup>a,b</sup>, Dongmin Jung<sup>c</sup>, Jiyeon Yun<sup>b</sup>, Seong Gu Heo<sup>b</sup>, Beung-Chul Ahn<sup>b</sup>, Chae Won Park<sup>b</sup>,  
Kyoung Ho Pyo<sup>b</sup>, You Jin Chun<sup>b</sup>, Min Hee Hong<sup>b</sup>, Hye Ryun Kim<sup>b\*</sup>, Byoung Chul Cho<sup>b\*</sup>

<sup>a</sup>*JEUK Institute for Cancer Research, JEUK Co.,Ltd., Gumi-City, Kyungbuk, Korea*

<sup>b</sup>*Yonsei Cancer Center, Division of Medical Oncology, Department of Internal Medicine, Yonsei University College of Medicine, Seoul, Korea*

<sup>c</sup>*Severance Biomedical Science Institute, Yonsei University of College of Medicine, Seoul, Korea*

**\*Corresponding author:** Byoung Chul Cho, MD, PhD, Yonsei Cancer Center, Division of Medical Oncology, Department of Internal Medicine, Yonsei University College of Medicine, 50 Yonsei-Ro, Seodaemun-Gu, Seoul, Korea. Phone: 82-2-2228-0870; Fax: 82-2-393-3562; E-mail: [CBC1971@yuhs.ac](mailto:CBC1971@yuhs.ac). Hye Ryun Kim, MD, Yonsei Cancer Center, Division of Medical Oncology, Department of Internal Medicine, Yonsei University College of Medicine, 50 Yonsei-Ro, Seodaemun-Gu, Seoul, Korea. Phone: 82-2-2228-0870; Fax: 82-2-393-3562; E-mail: NOBELG@yuhs.ac

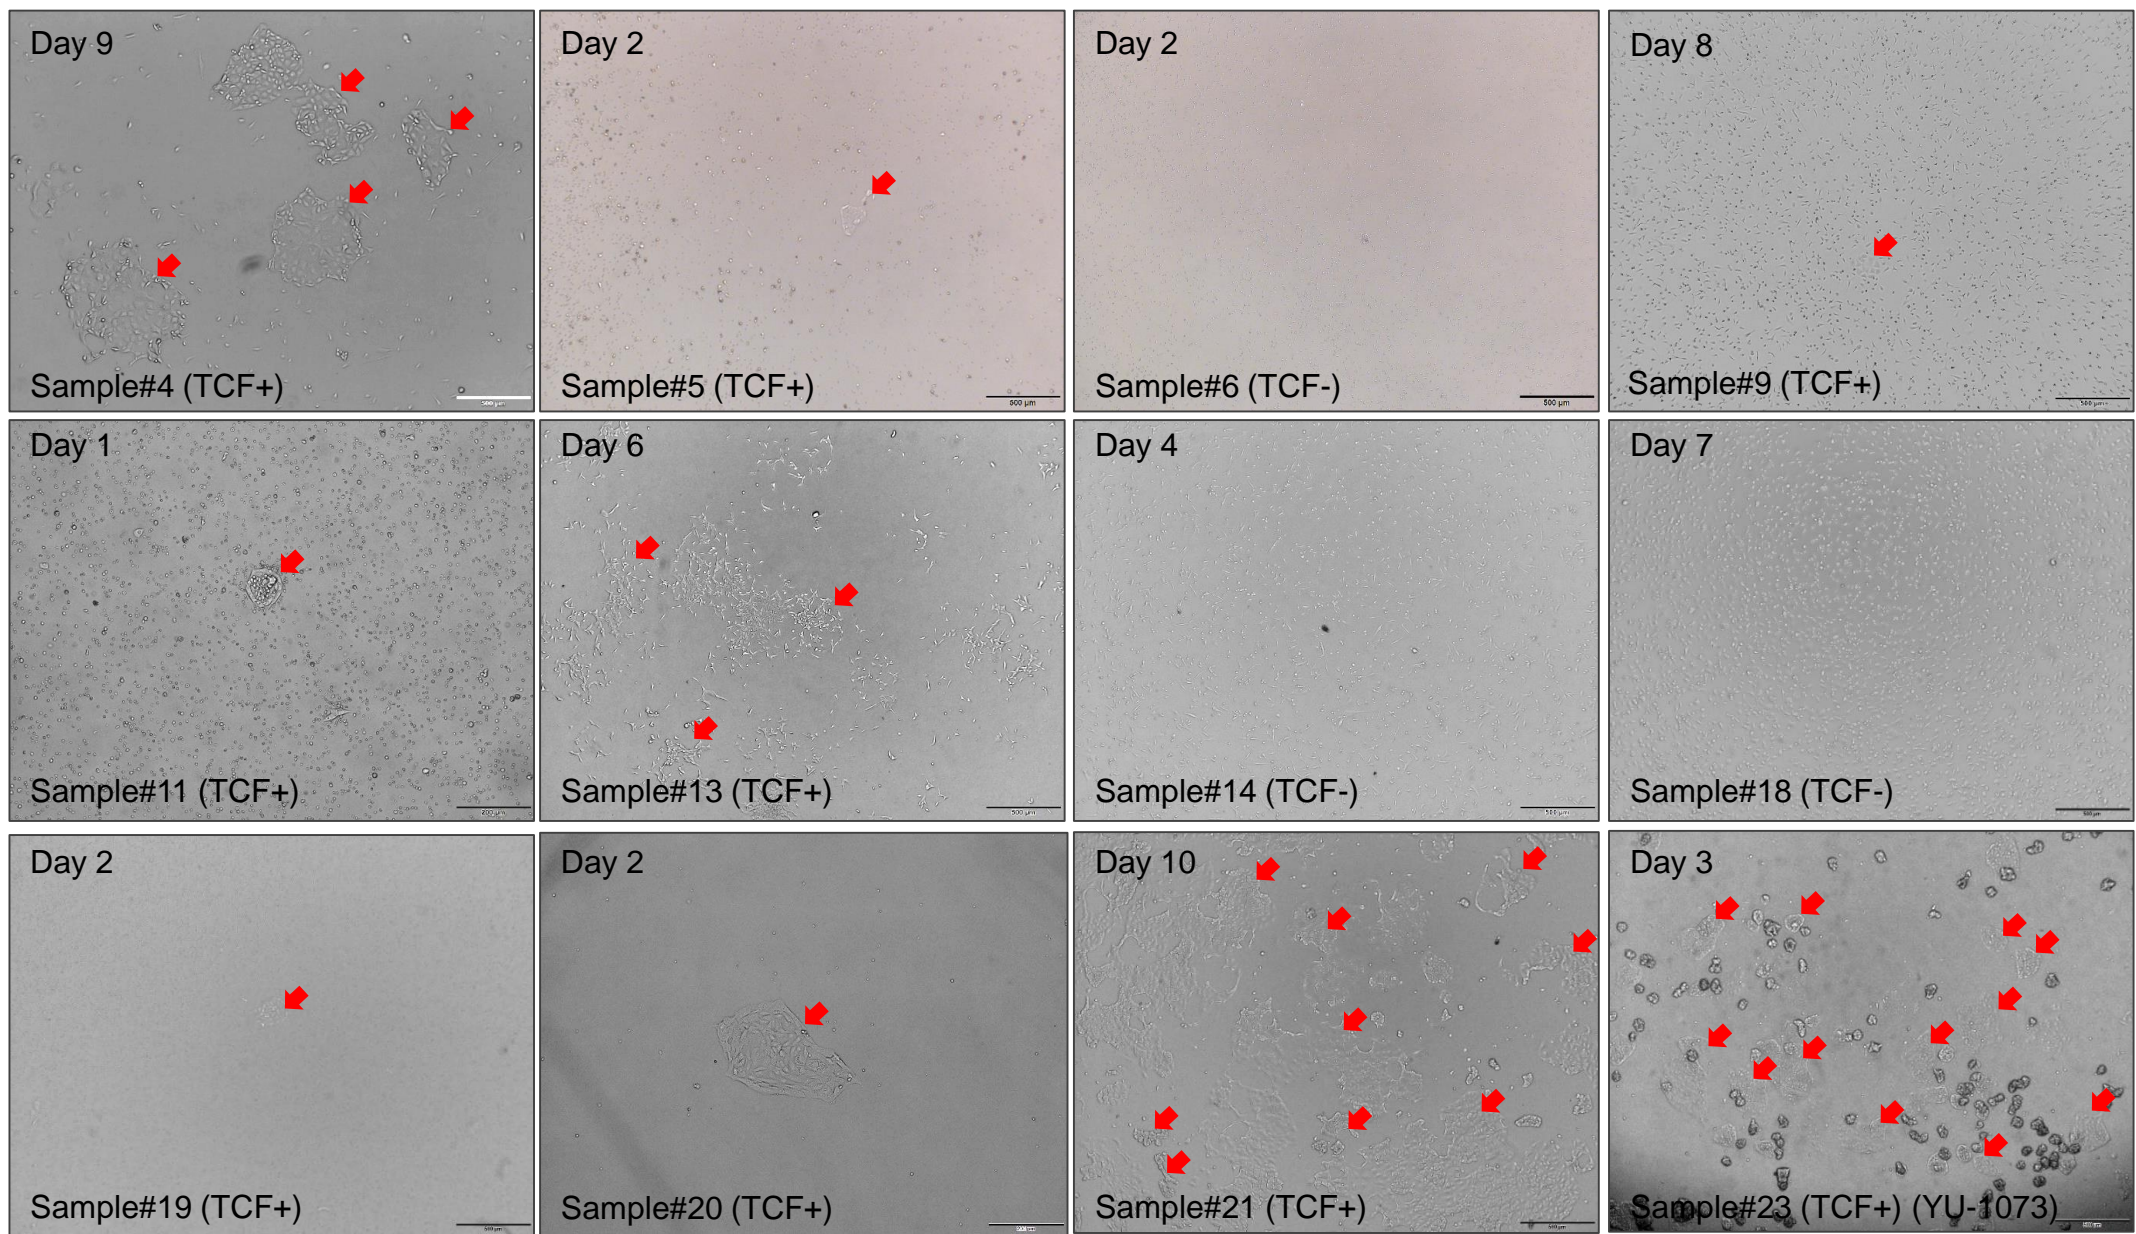

**Supplementary Figure 1. Adherent tumor cells with an epithelial cell morphology, or tumor colony, were occasionally observed in primary cultures within 1 to 10 days of culture initiation.** Light microscopic pictures showing 12 representative cases of primary cultures. A number of days after culture initiation is described for each case. Tumor colonies are indicated as red arrows.

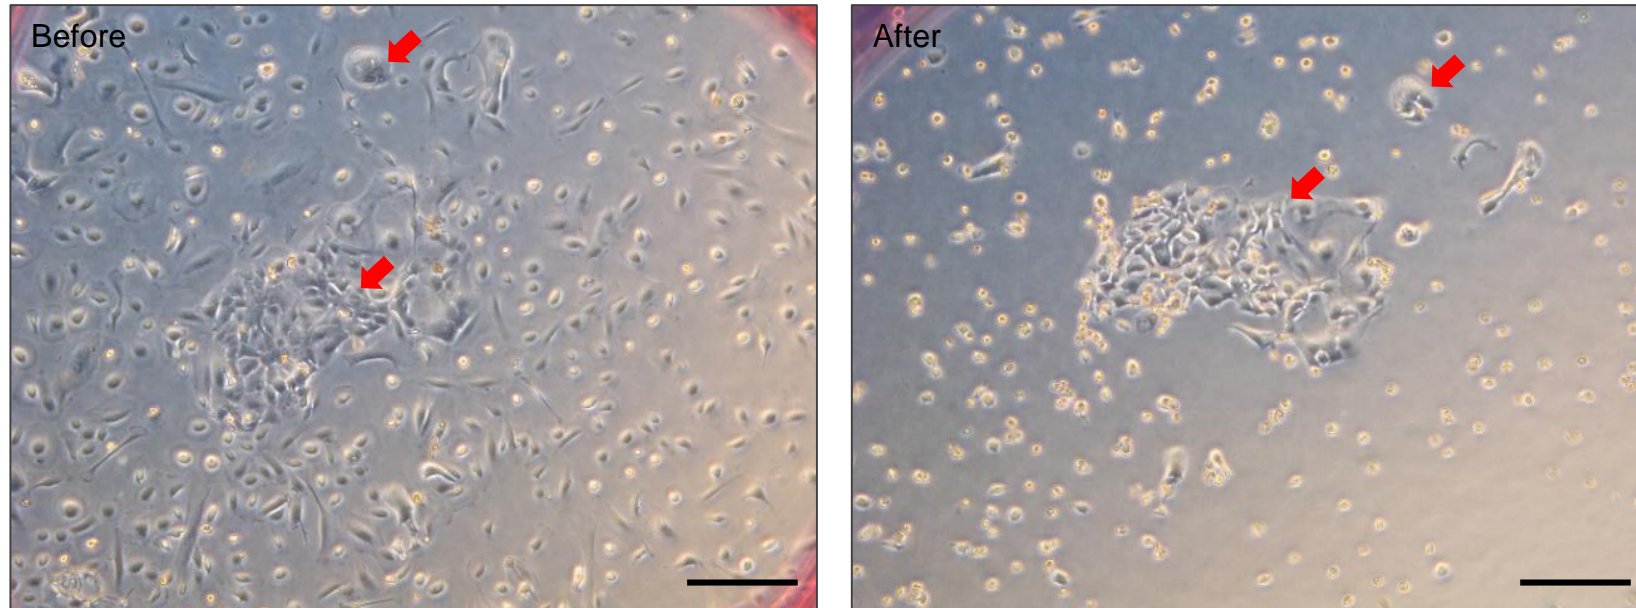

**Supplementary Figure 2. Differential trypsinization method to eradicate the contamination.** Representative light microscopic data showing a primary culture (sample#83) contaminated with stromal cells (upper) (scale bar, 500  $\mu\text{m}$ ). Tumor colonies are indicated as red arrows. Differential trypsinization was applied to the primary culture to remove the stromal cells (lower). In general, a primary culture was washed with PBS and treated with 0.25% Trypsin-EDTA (Thermo Fisher Scientific, Waltham, MA) that was diluted with PBS at a ratio of 1:2 to 1:10. Then, the primary culture was incubated for 0.5 to 10 minutes at room temperature to a time point when tumor colonies remain attached to and stromal cells detached from a cell culture plate. Next, supernatant containing stromal cells were discarded. The cell culture plate containing tumor colonies were carefully washed with R10 medium and replenished with fresh R10 medium.

A

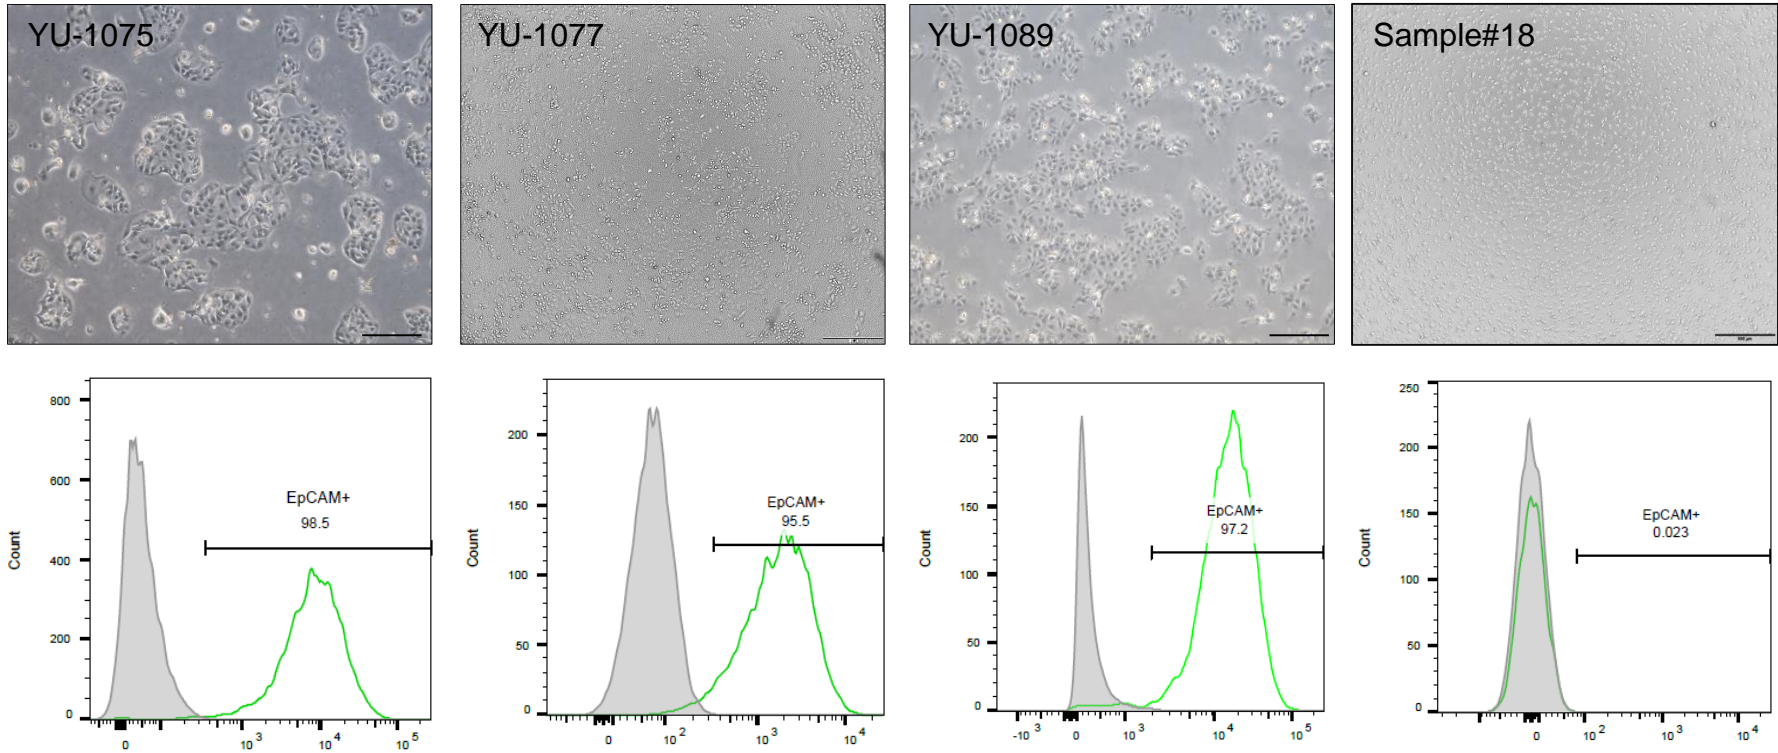

B

| Cell line ID | <i>In vitro</i> sensitivity to entrectinib (IC <sub>50</sub> , nmol/L) | Prior TKI therapy | Subsequent TKI therapy | Best response by RECIST criteria | PFS on subsequent therapy (Mo) | Response in the clinic vs <i>in vitro</i> sensitivity |
|--------------|------------------------------------------------------------------------|-------------------|------------------------|----------------------------------|--------------------------------|-------------------------------------------------------|
| YU-1080      | 5                                                                      | N/A               | Entrectinib            | PR                               | 6.54                           | Matching                                              |

**Supplementary Figure 3. Establishment of PDCs.** (A) Light microscopic pictures showing representative cases of successful (YU-1075, YU-1077, and YU-1089) or failed (Sample#18) primary cultures (scale bar, 500 μm). Successful primary cultures were free of stromal cells and contained tumor cells compared to the failed primary culture (upper panel). Primary cultures were stained with matching isotype control (grey curve) or PE-conjugated human EpCAM antibody (green curve) and analyzed by flow cytometry (lower panel). The x-axis shows fluorescence intensity and the y-axis shows the number of stained cells. A proportion of EpCAM-expressing cells were >95% in successful cases, whereas the proportion was extremely scarce in the sample#18. (B) Table showing *in vitro* sensitivity to entrectinib in YU-1080 cells and clinical outcome in the corresponding patient. N/A, not available; PR, partial response; PFS, progression-free survival.

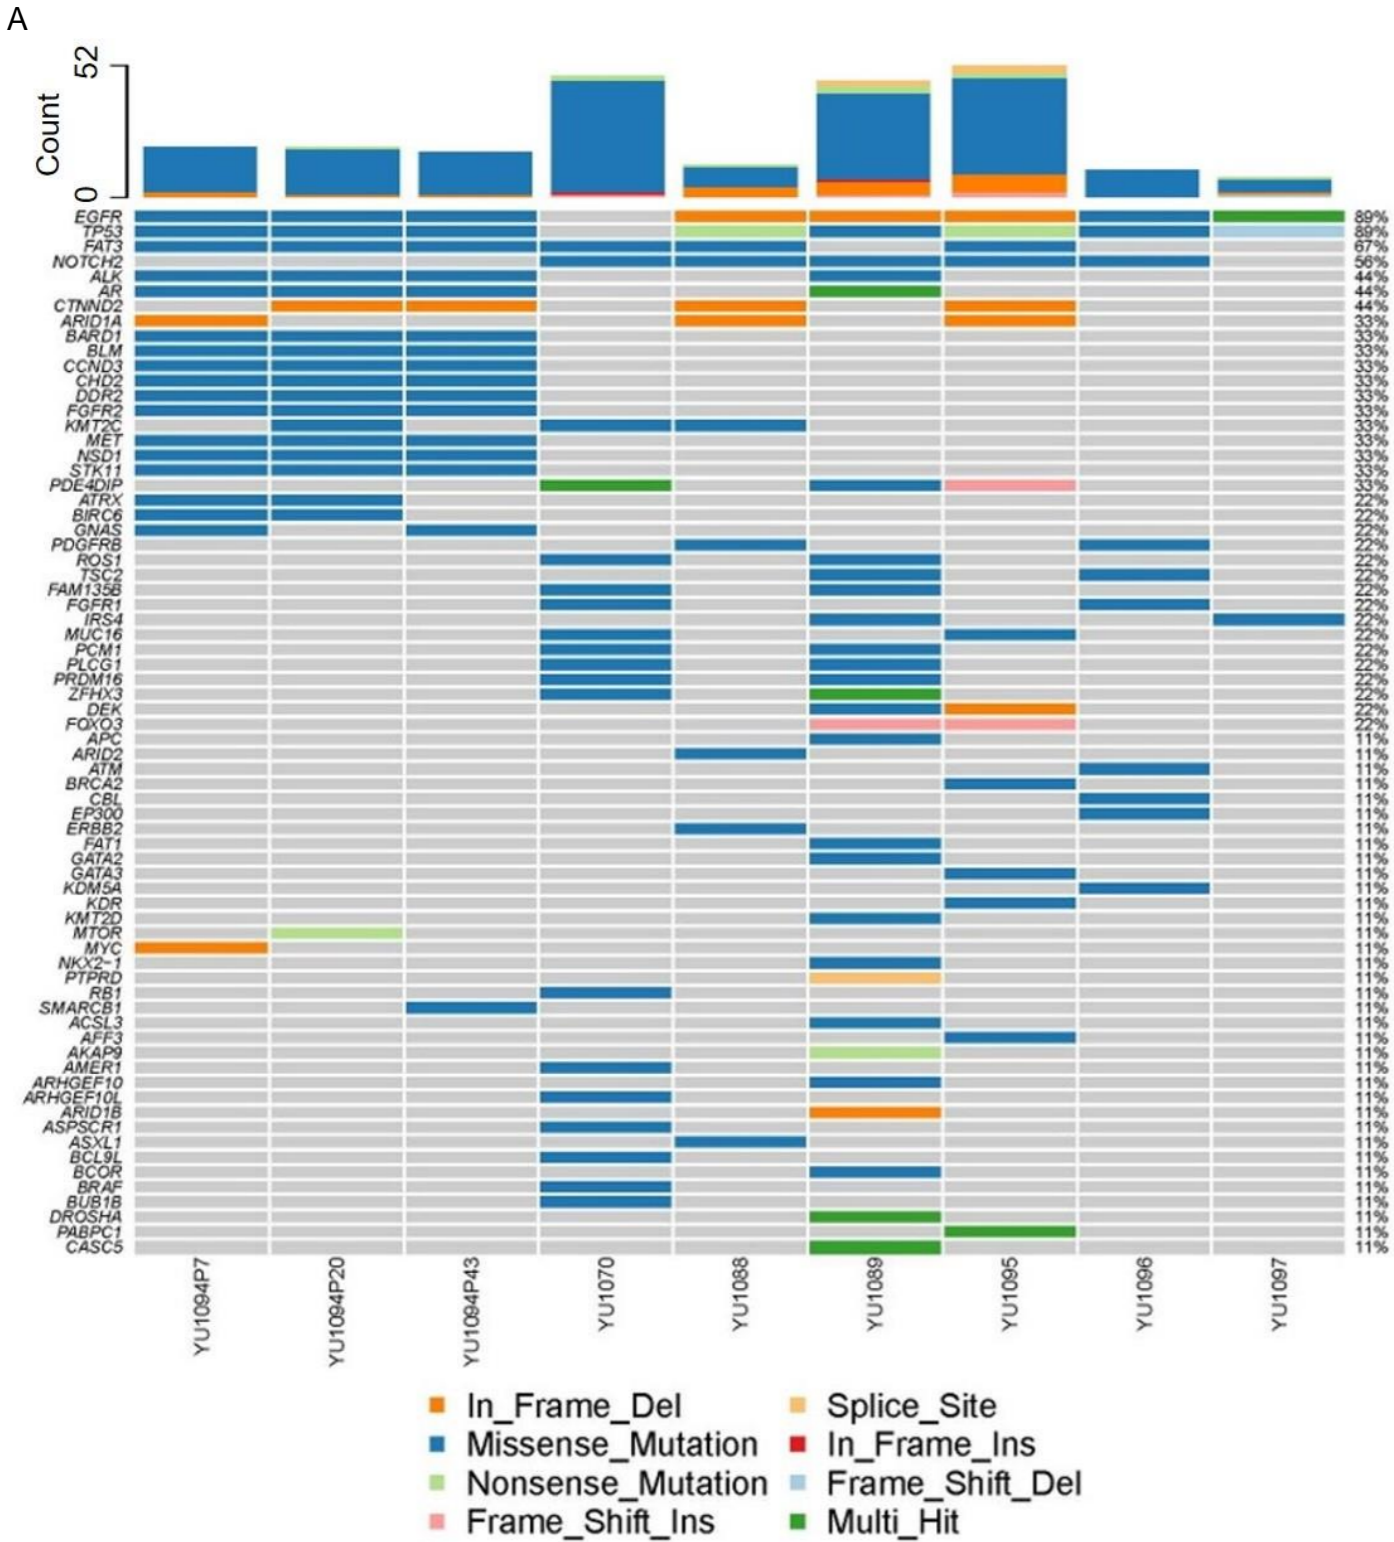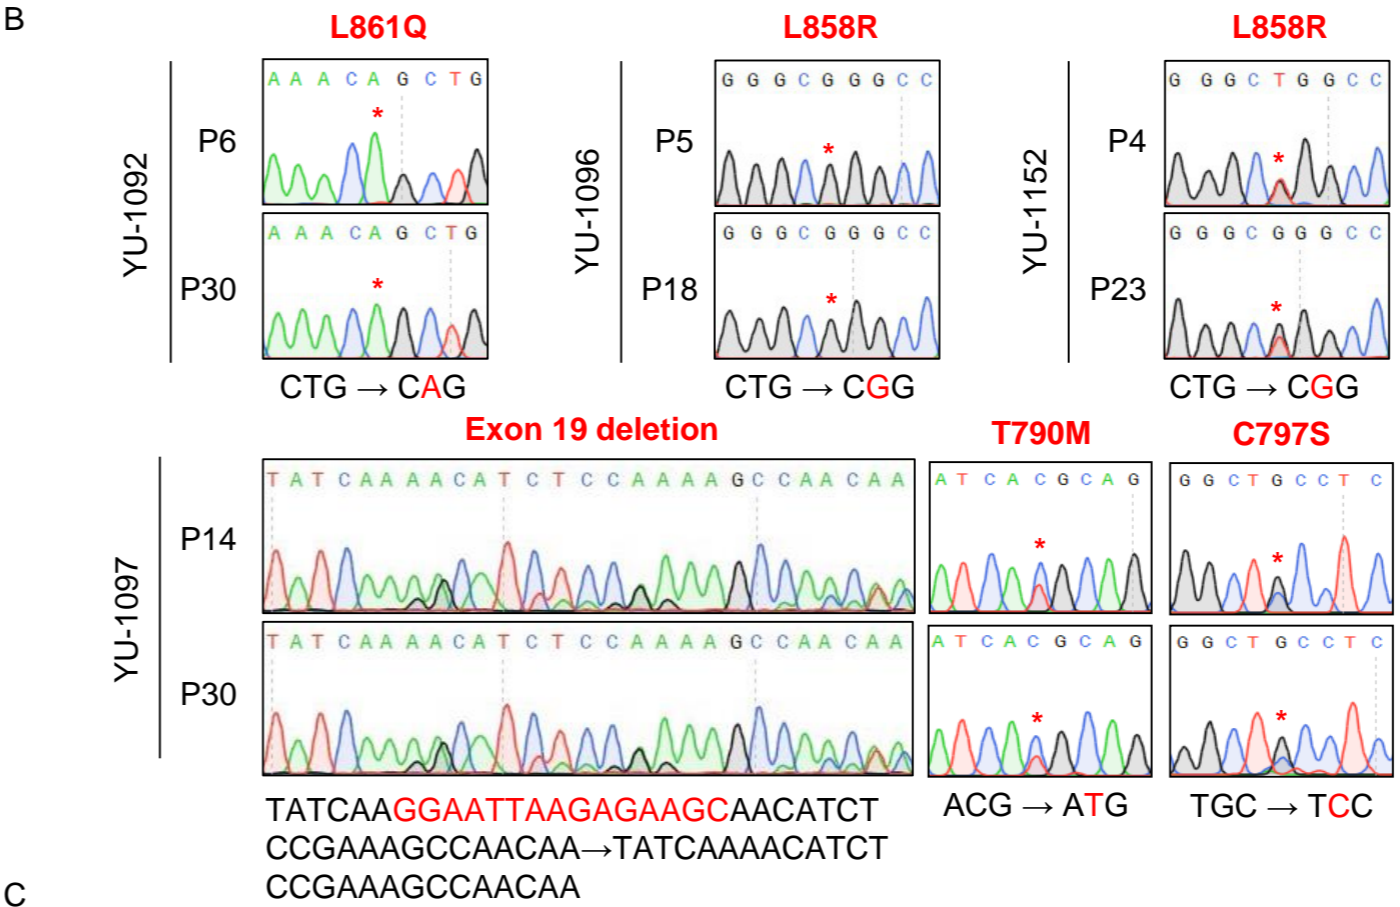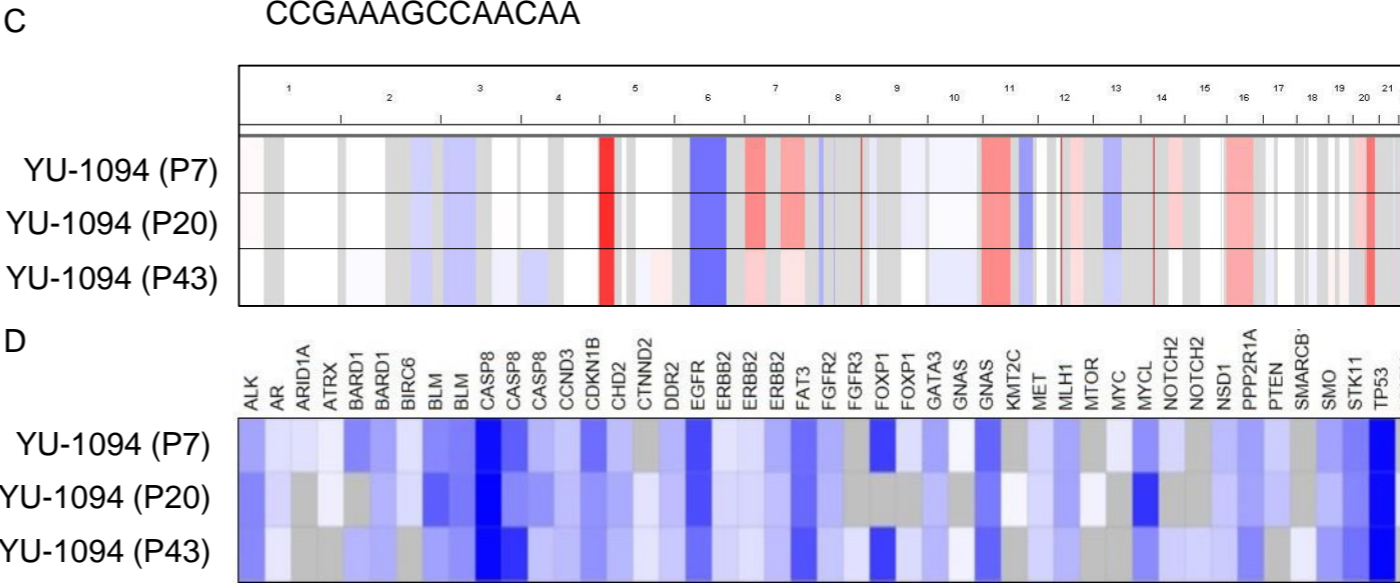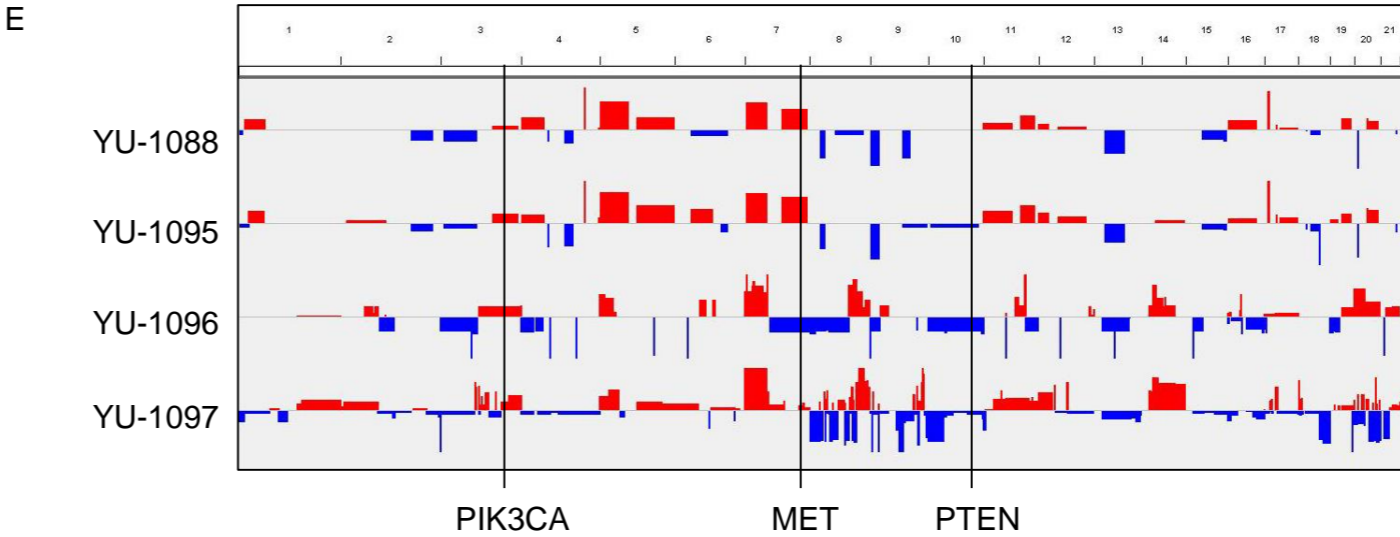

**Supplementary Figure 4. Whole-exome sequencing and direct sequencing analysis in PDCs.** (A) A list of frequently mutated tumor-related genes detected in YU-1094 at passage 7, YU-1094 at passage 20, YU-1094 at passage 43, YU-1070, YU-1088, YU-1089, YU-1095, YU-1096, and YU-1097 cells (from left to right) (see methods). Frequency was calculated as (a number of sample that harbors the indicated genetic alteration)/(a total number of samples) in percent value. Top 70 genes are shown. (B) Direct sequencing analysis of EGFR exon 18 to 21 in YU-1092, YU-1096, YU-1152, (upper) and YU-1097 cells (lower) at early and later passage. Passage number is indicated on left side of DNA chromatogram. Base change or exon deletion is indicated in red. (C) Copy number variation profile of YU-1094 cells at multiple passages (P7, P20, and P43). Read count ratio of tumor to matching normal blood on the log2 scale is shown. (D) Plot showing mutation allele frequency of tumor-related genes in YU-1094 cells at multiple passages (P7, P20, and P43). (E) Copy number variation in PDCs resistant to third generation EGFR-TKIs (YU-1088, YU-1095, YU-1096, and YU-1097). Previous reported mechanisms of resistance to osimertinib (PIK3CA amplification, MET amplification, PTEN loss) are indicated.

**A**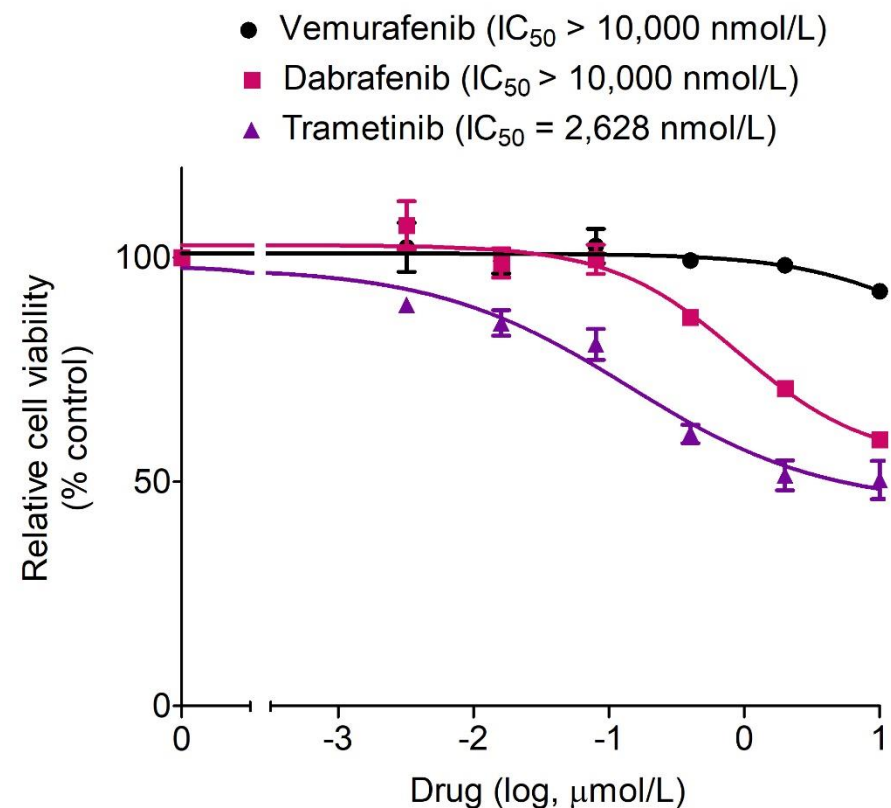**B**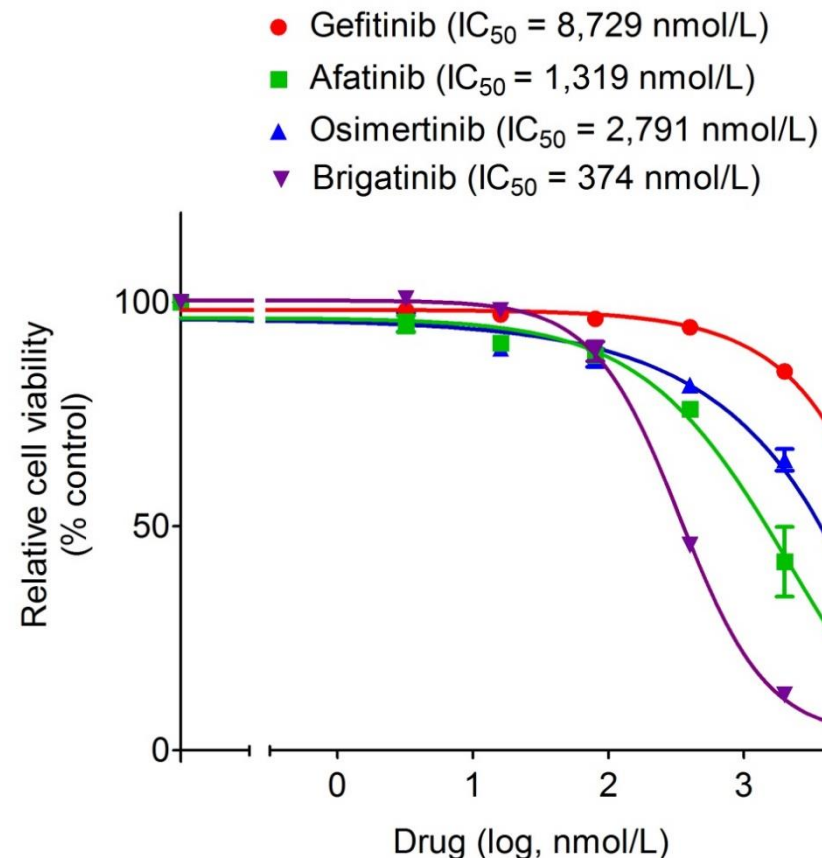

**Supplementary Figure 5. *In vitro* response to TKIs in YU-1070 cells and YU-1097 cells.** (A) YU-1070 cells were treated with the indicated concentrations of vemurafenib, darafenib, or trametinib alone. Cell viability was measured by CellTiter-Glo. Data are presented as the mean  $\pm$  SEM ( $n = 3$ ). (B) YU-1097 cells were treated with the indicated concentrations of gefitinib, afatinib, osimertinib, or brigatinib. Cell viability was measured by CellTiter-Glo. Data are presented as the mean  $\pm$  SEM ( $n = 3$ ).

**A**

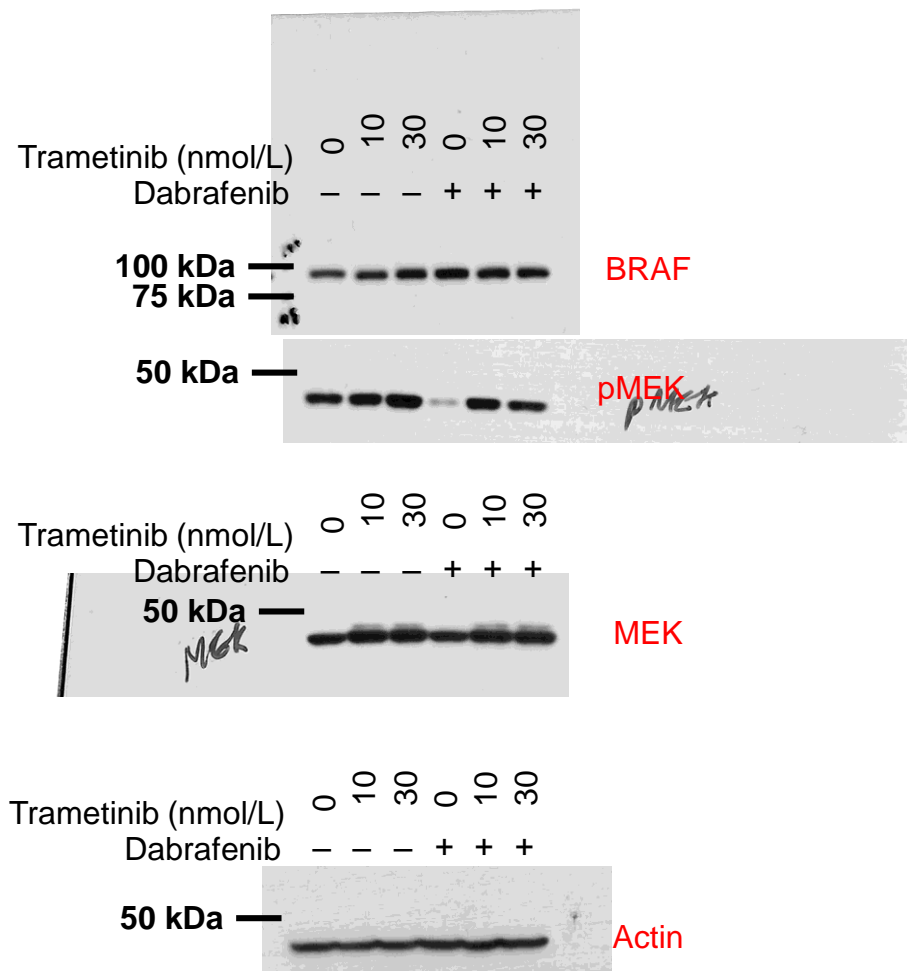

**B**

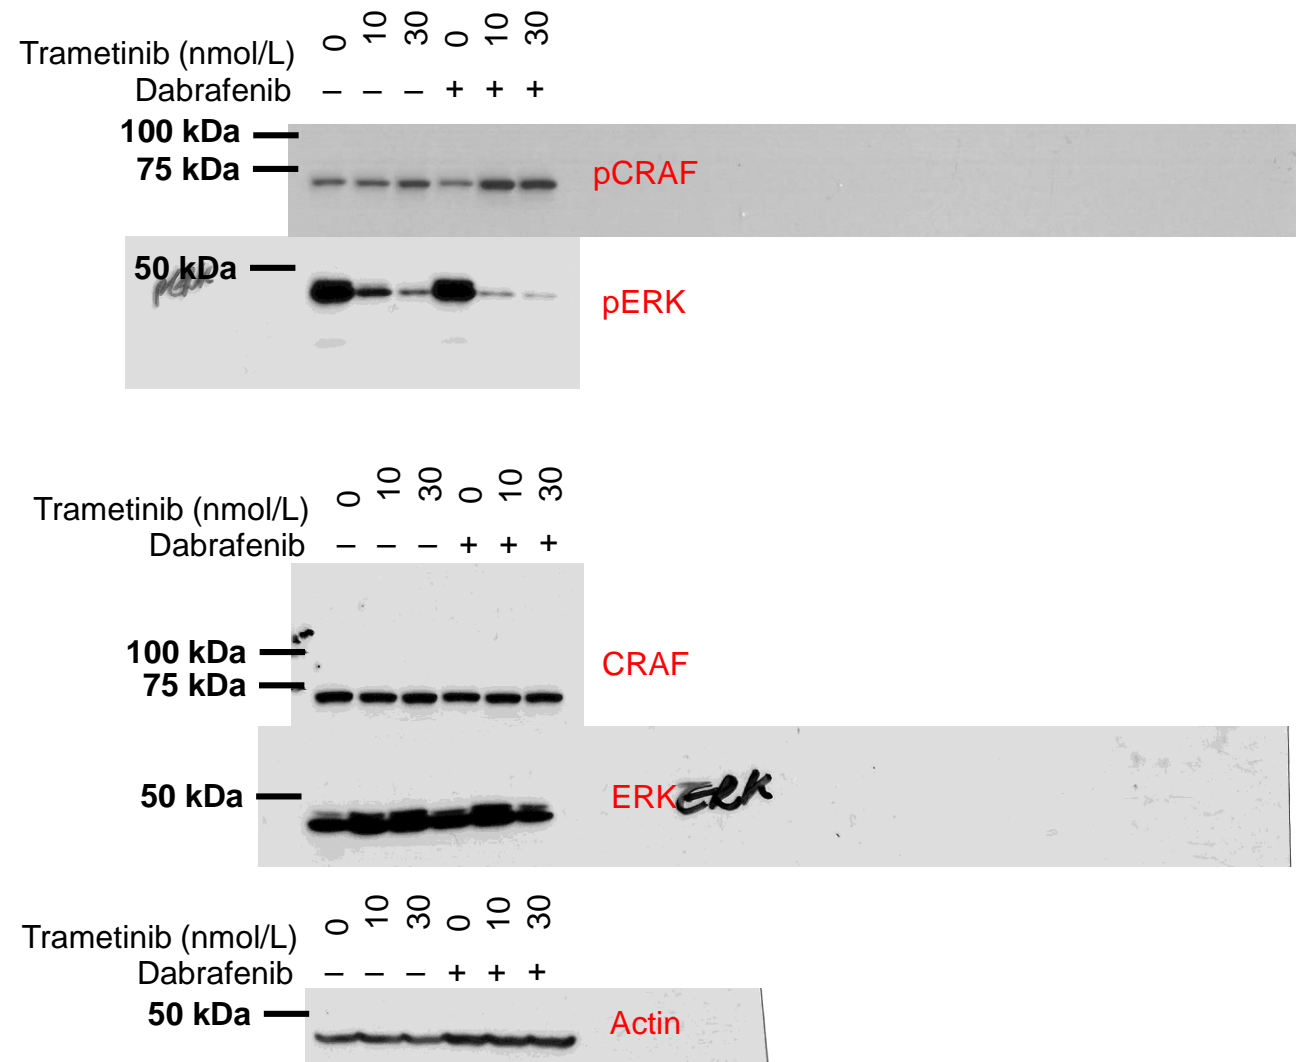

Western blot analysis of EGFR, AKT, and ERK phosphorylation in A549 cells. The blot shows bands for pEGFR (approx. 200 kDa), pAKT (approx. 45 kDa), and pERK (approx. 44 kDa). Molecular weight markers are indicated on the left at 250, 150, 75, and 50 kDa. The right side of the blot is labeled with the protein names in red: pEGFR, pAKT, and pERK. The treatment groups are labeled at the top: DMSO, Gefitinib, Afatinib, and Osimertinib, with concentrations 100 and 1,000 nmol/L indicated below each group.

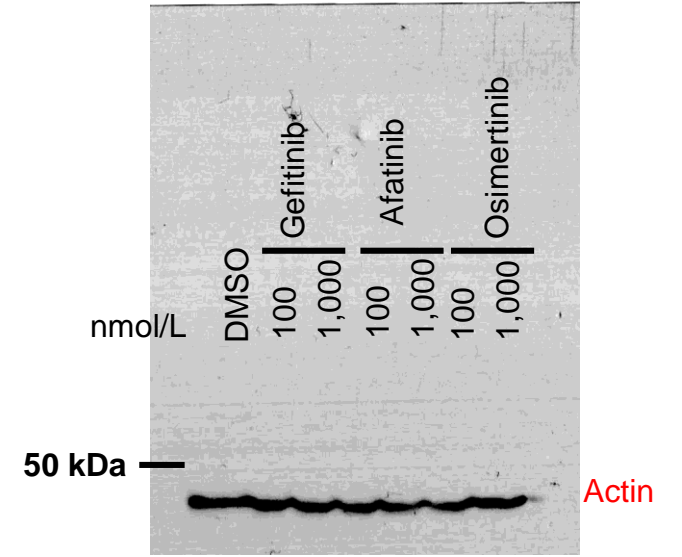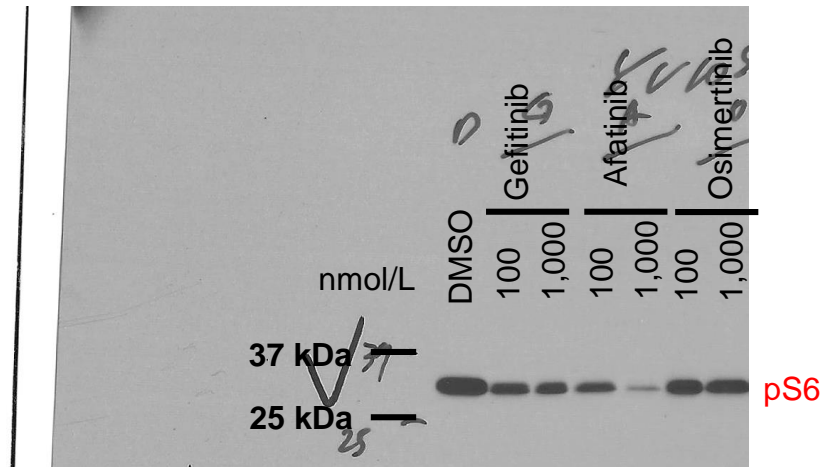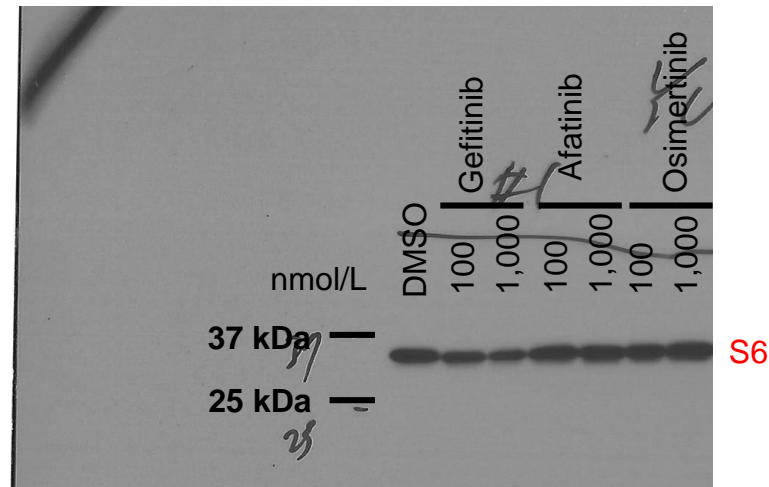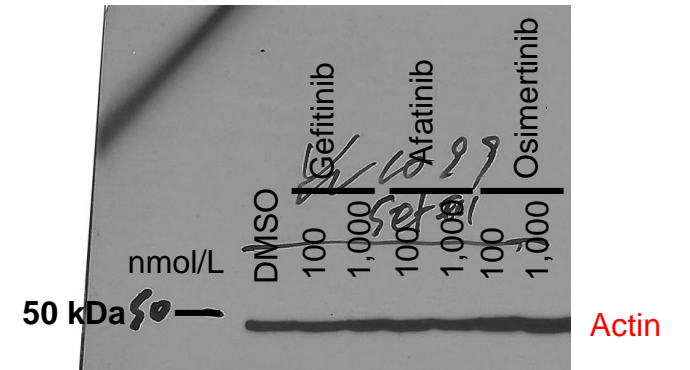

D

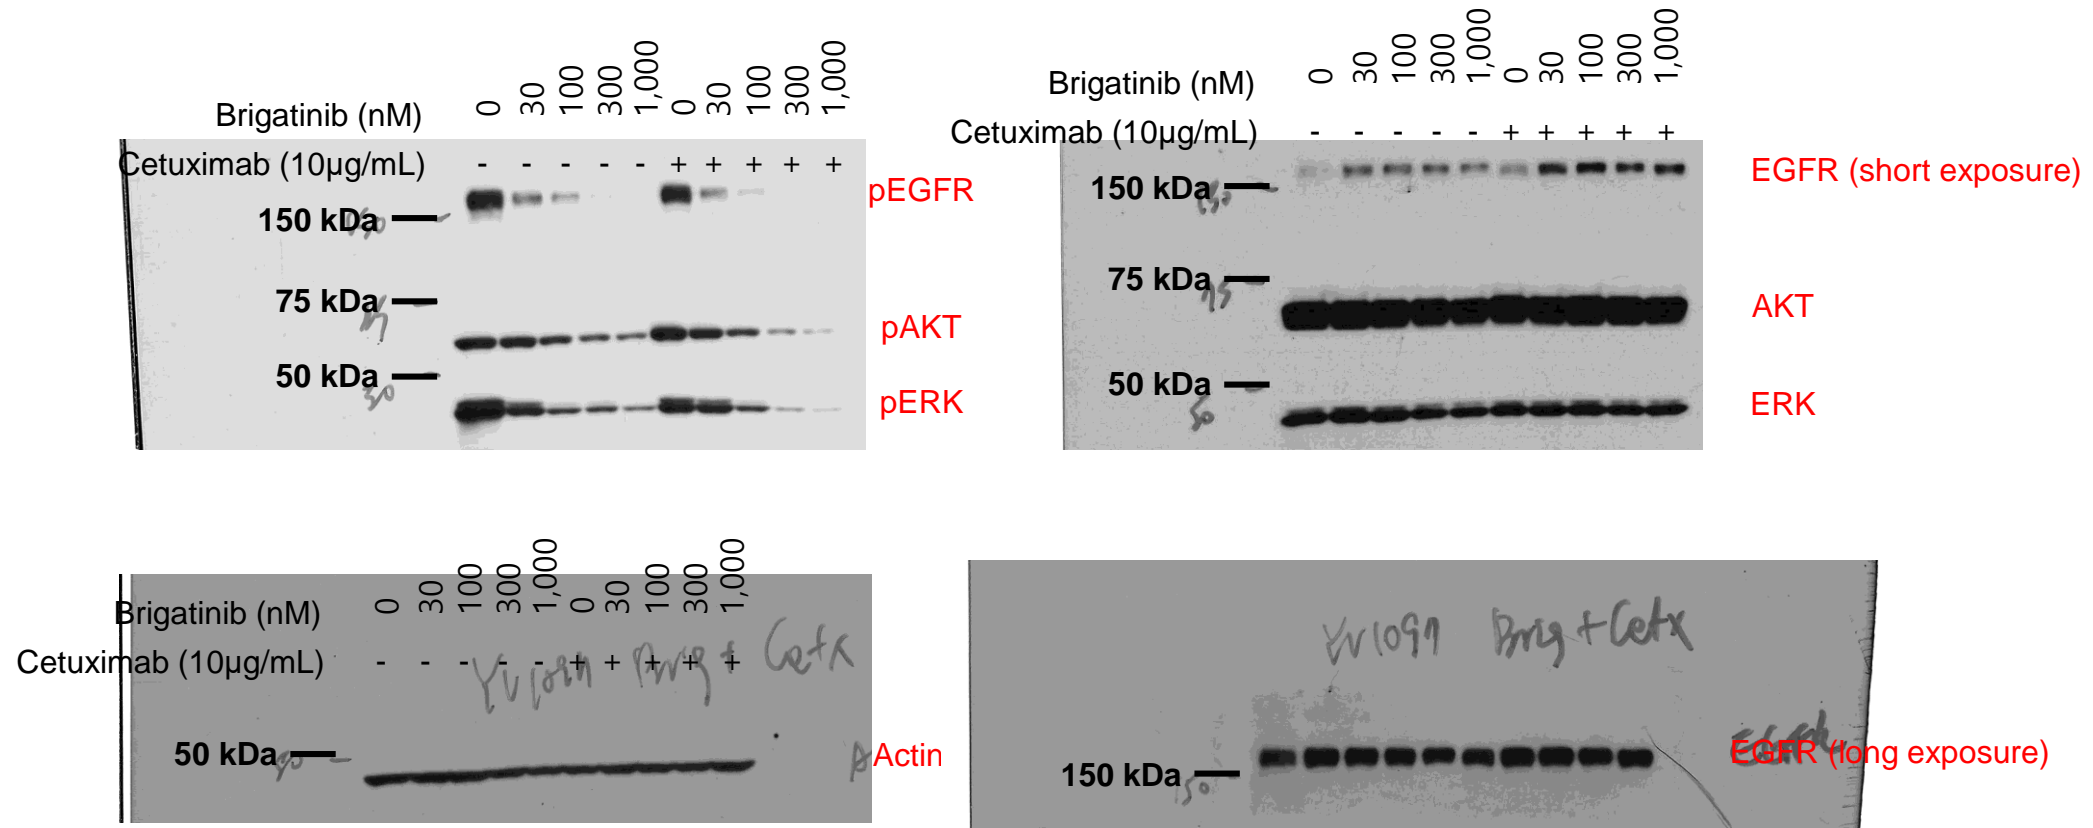

**Supplementary Figure 6. Full-length blots related to Figure 3.** (A) Immunoblots to assess BRAF and phospho-MEK in YU-1070 cells. Membranes were stripped and re-blotted for MEK and Actin. (B) Immunoblots to assess phospho-CRAF and phospho-ERK in YU-1070 cells. Membranes were stripped and re-blotted for total CRAF, total ERK, and Actin. (C) Immunoblots to assess phospho-EGFR, phospho-AKT, phospho-ERK, and phosphor-S6 in YU-1099 cells. Membranes were stripped and re-blotted for total EGFR, total AKT, total ERK, total S6 and Actin. (D) Immunoblots to assess phospho-EGFR, phospho-AKT, and phospho-ERK in YU-1097 cells. Membranes were stripped and re-blotted for total EGFR, total AKT, total ERK, and Actin.

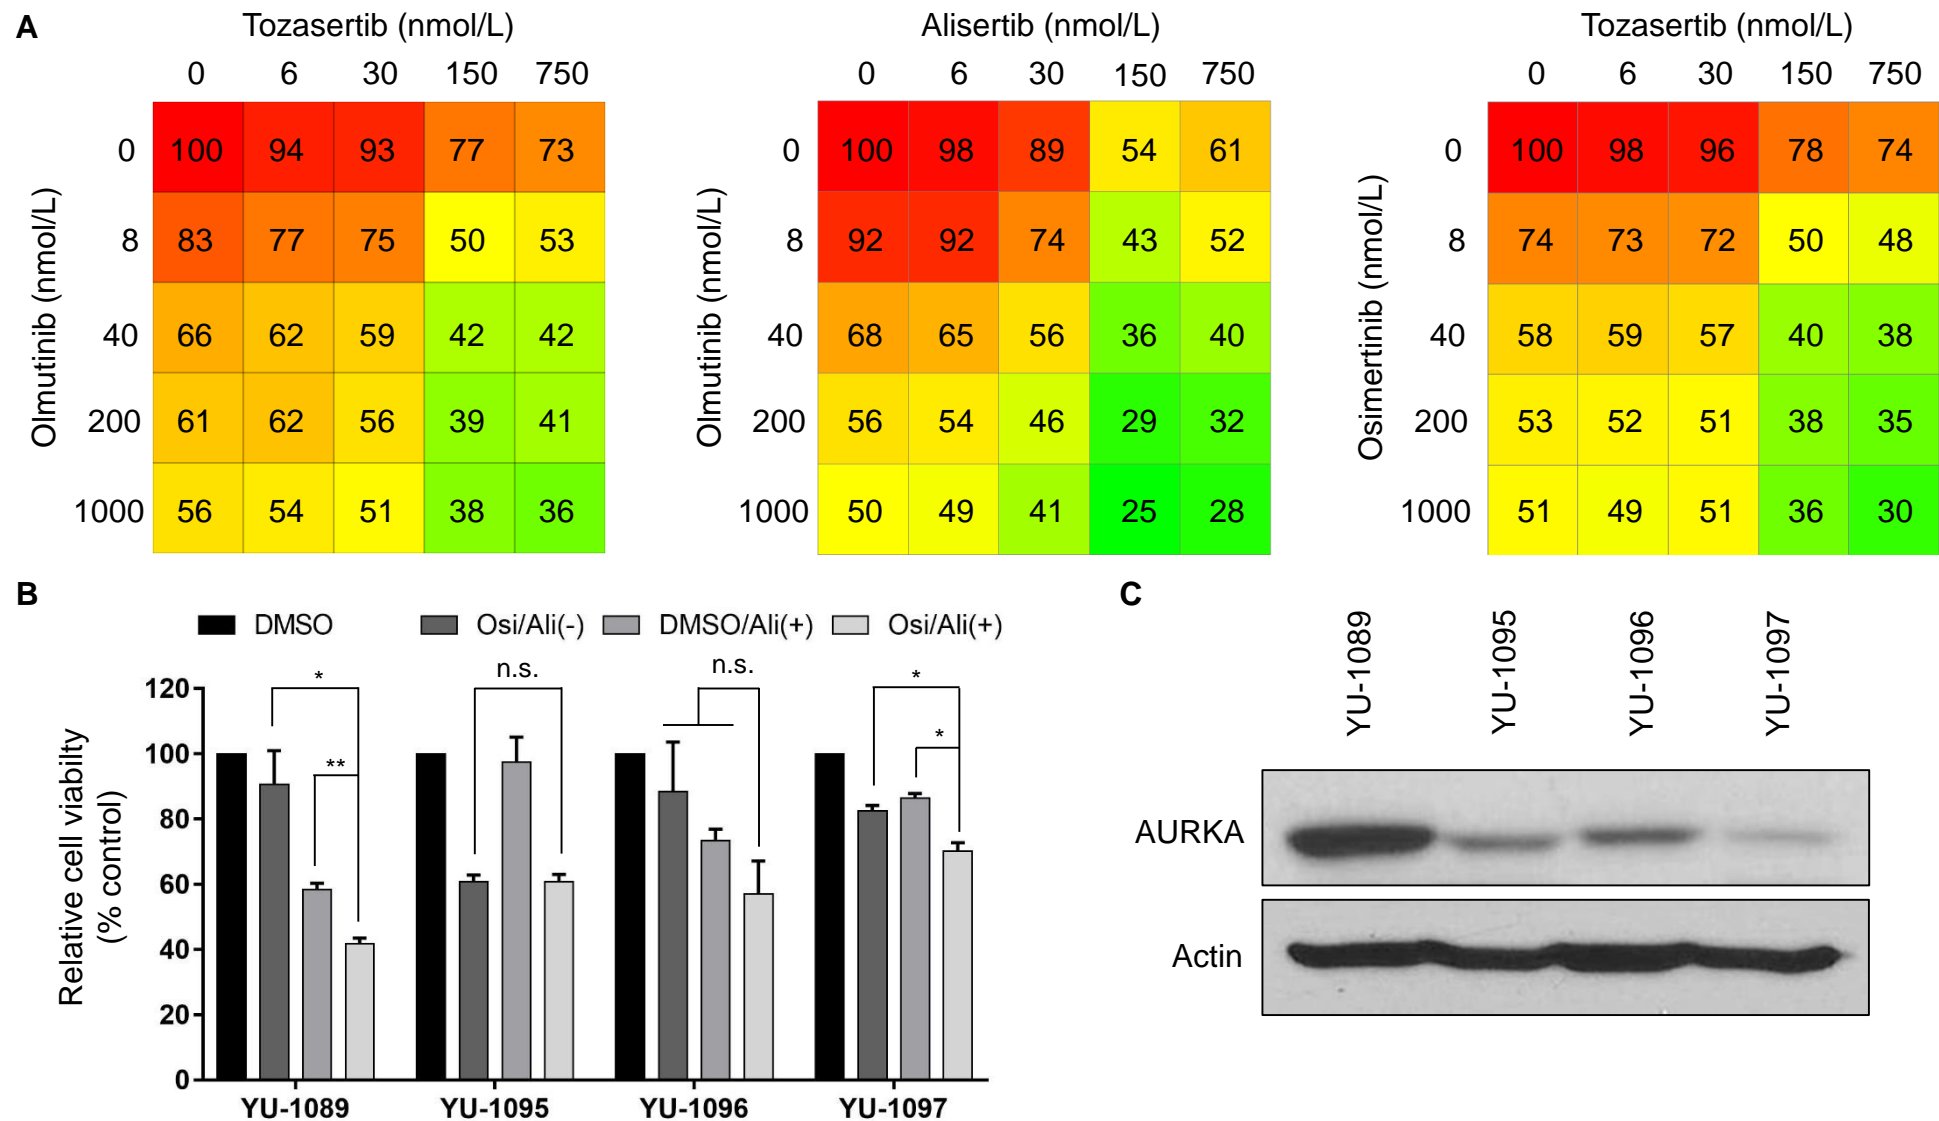

**Supplementary Figure 7. Combined EGFR and AURKA inhibition overcomes resistance to third-generation EGFR-TKIs in YU-1089 cells.** (A) 5 x 5 dose response matrices showing responses of YU-1089 cells to a combination of olmutinib and tozasertib (left), olmutinib and alisertib (middle), and osimertinib and tozasertib (right) at the indicated concentrations of the drugs. Response values are relative cell viability compared to DMSO control. Cell viability was measured by CellTiter-Glo. Data are presented as the mean (n = 3). Combination index (CI) was calculated using the Chou-Talalay method. (B) YU-1089, YU-1095, YU-1096, and YU-1097 cells were treated with osimertinib at 200 nM with or without alisertib (150 nM). Cell viability was measured by CellTiter-Glo. Data are presented as the mean  $\pm$  SEM (n = 3) (two-tailed Student *t*-test: \**p*<0.05, \*\**p*<0.005 vs the value at the indicated comparison). n.s., not significant. (C) Endogenous expression of AURKA in YU-1089, YU-1095, YU-1096, and YU-1097 cells. Cell lysates were immunoblotted with the indicated antibodies. Full-length blots can be found in Supplementary Figure 8.

A

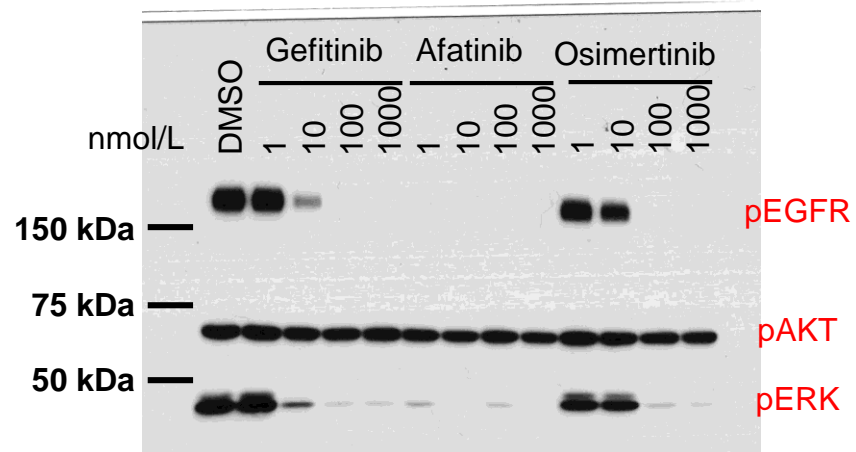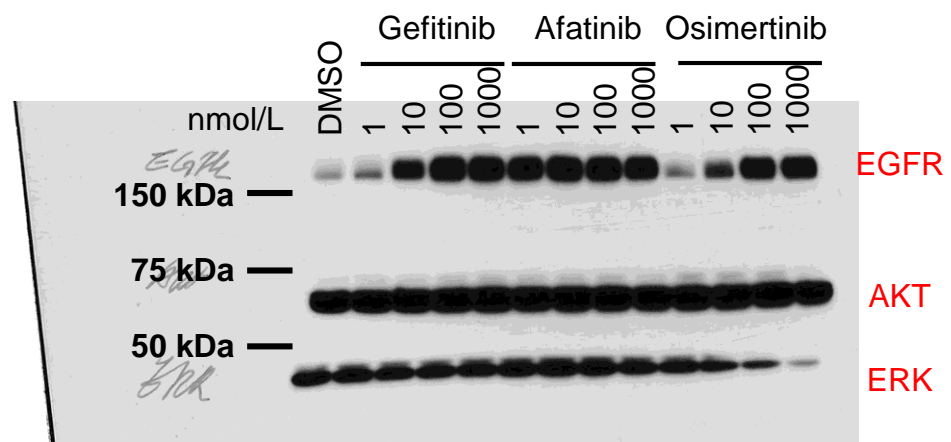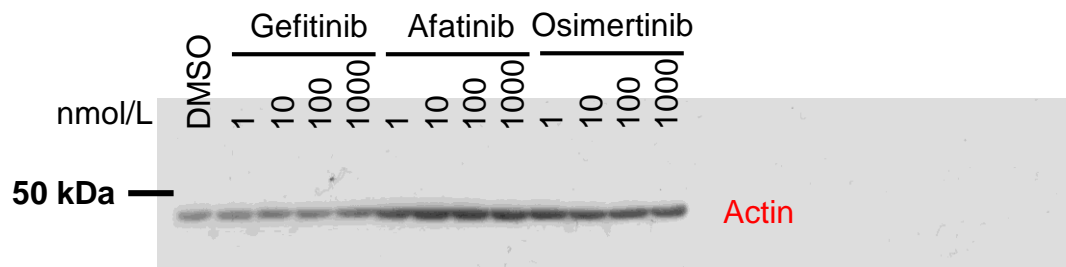

B

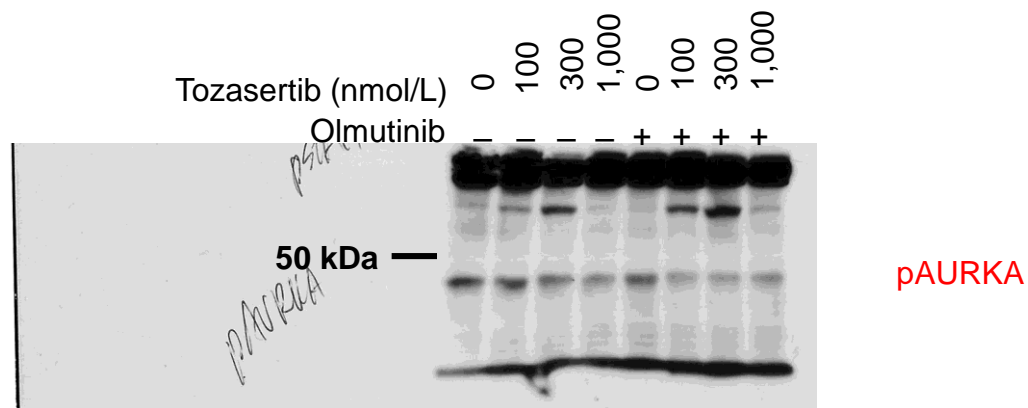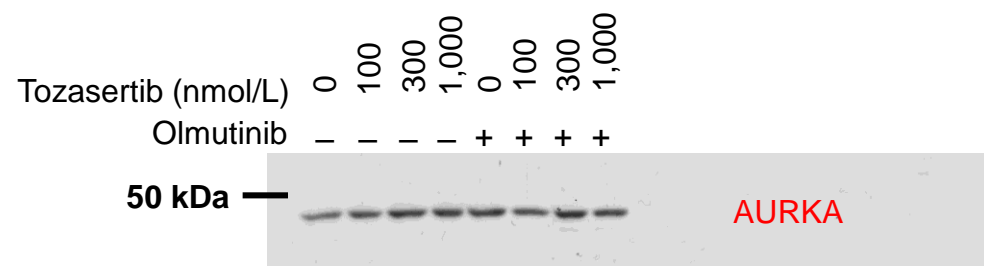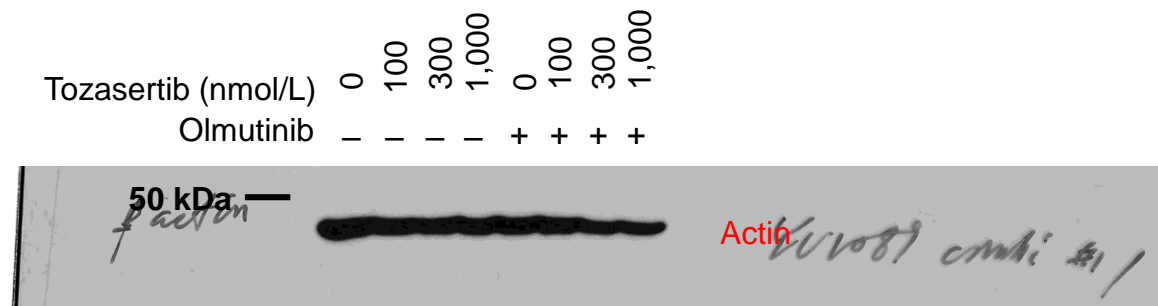

C

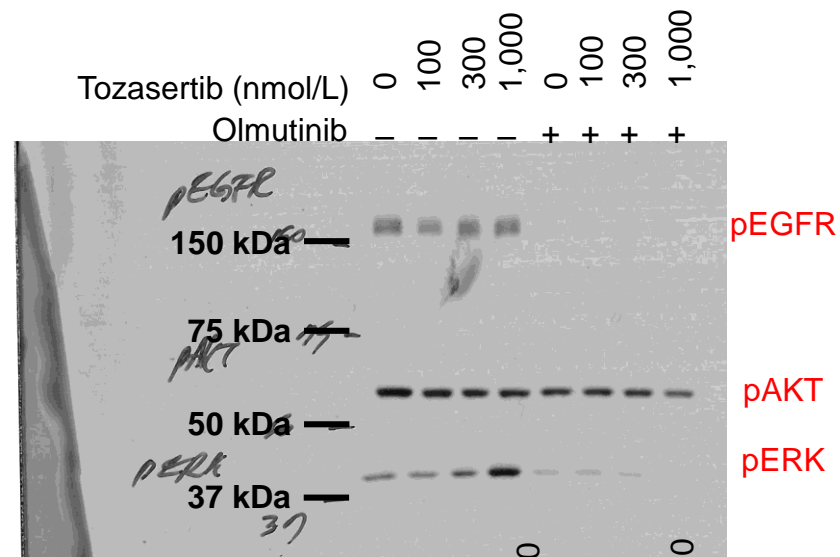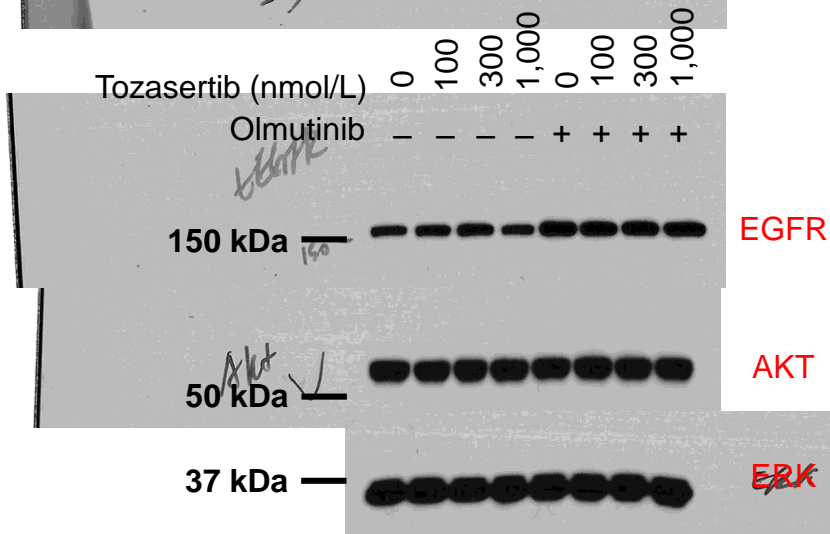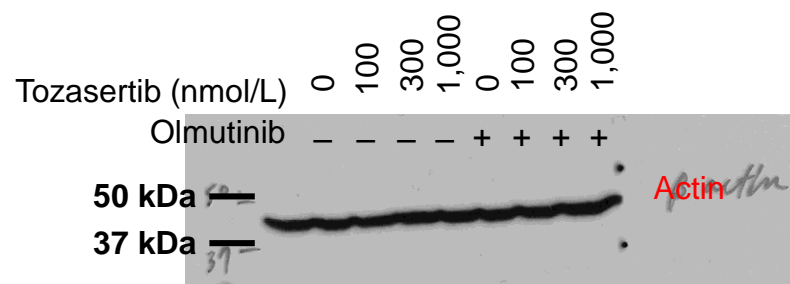

D

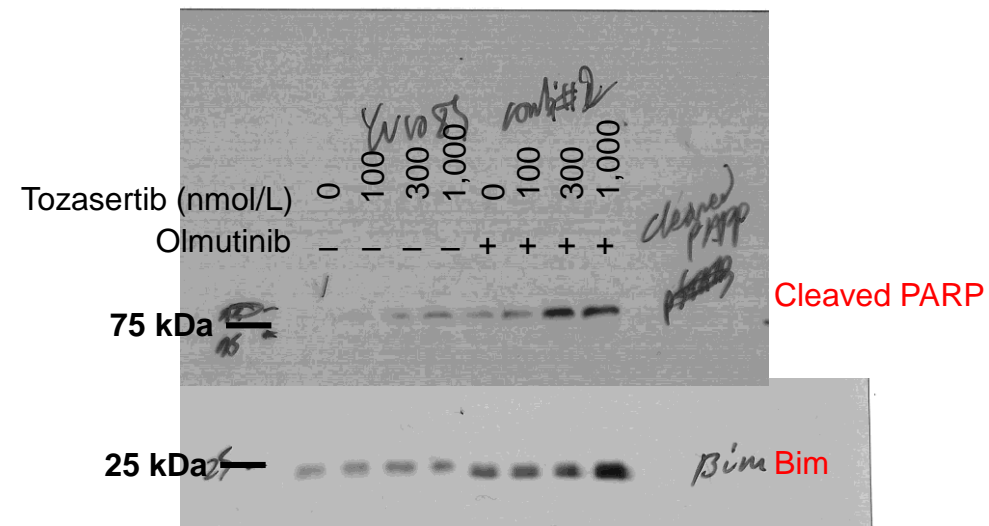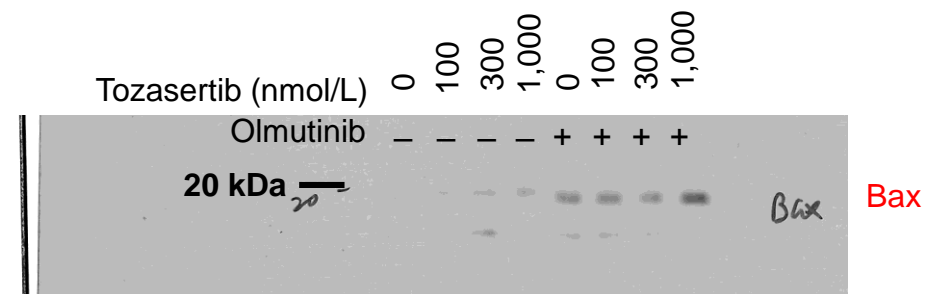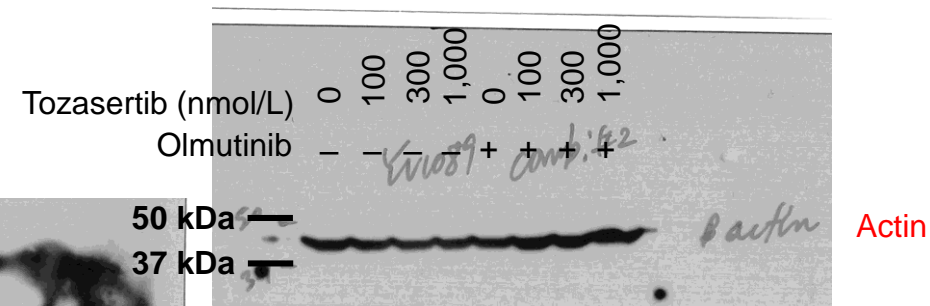

E

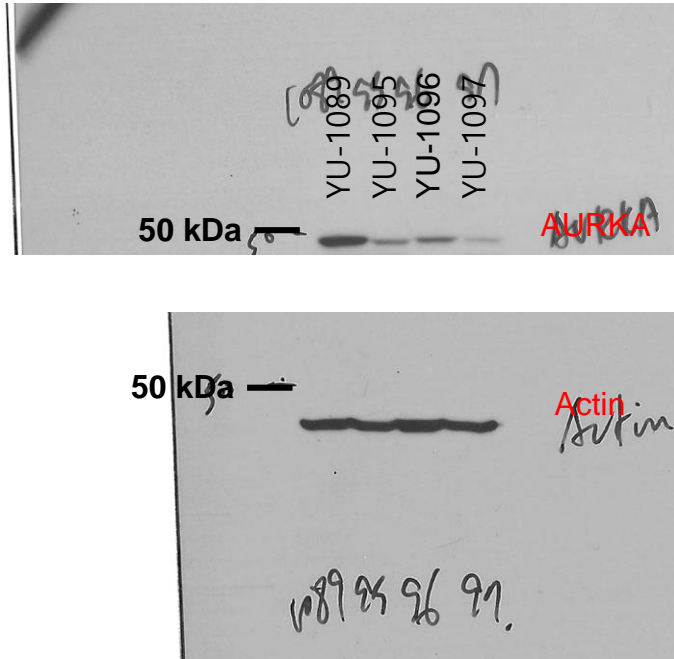

**Supplementary Figure 8. Full-length blots related to Figure 4 and Supplementary Figure 7.** (A) Immunoblots to assess phospho-EGFR, phospho-AKT, and phospho-ERK in YU-1089 cells. Membranes were stripped and re-blotted for total EGFR, total AKT, total ERK, and Actin. (B) Immunoblots to assess phospho-AURKA in YU-1897 cells. Membranes were stripped and re-blotted for total AURKA and Actin. (C) Immunoblots to assess phospho-EGFR, phospho-AKT, and phospho-ERK in YU-1089 cells. Membranes were stripped and re-blotted for total EGFR, total AKT, total ERK, and Actin. (D) Immunoblots to assess cleaved PARP and Bim in YU-1089 cells. Membranes were stripped and re-blotted for Bax and Actin. (E) Immunoblots to assess AURKA in YU-1089, YU-1095, YU-1096, and YU-1097 cells. Membranes were stripped and re-blotted for Actin.

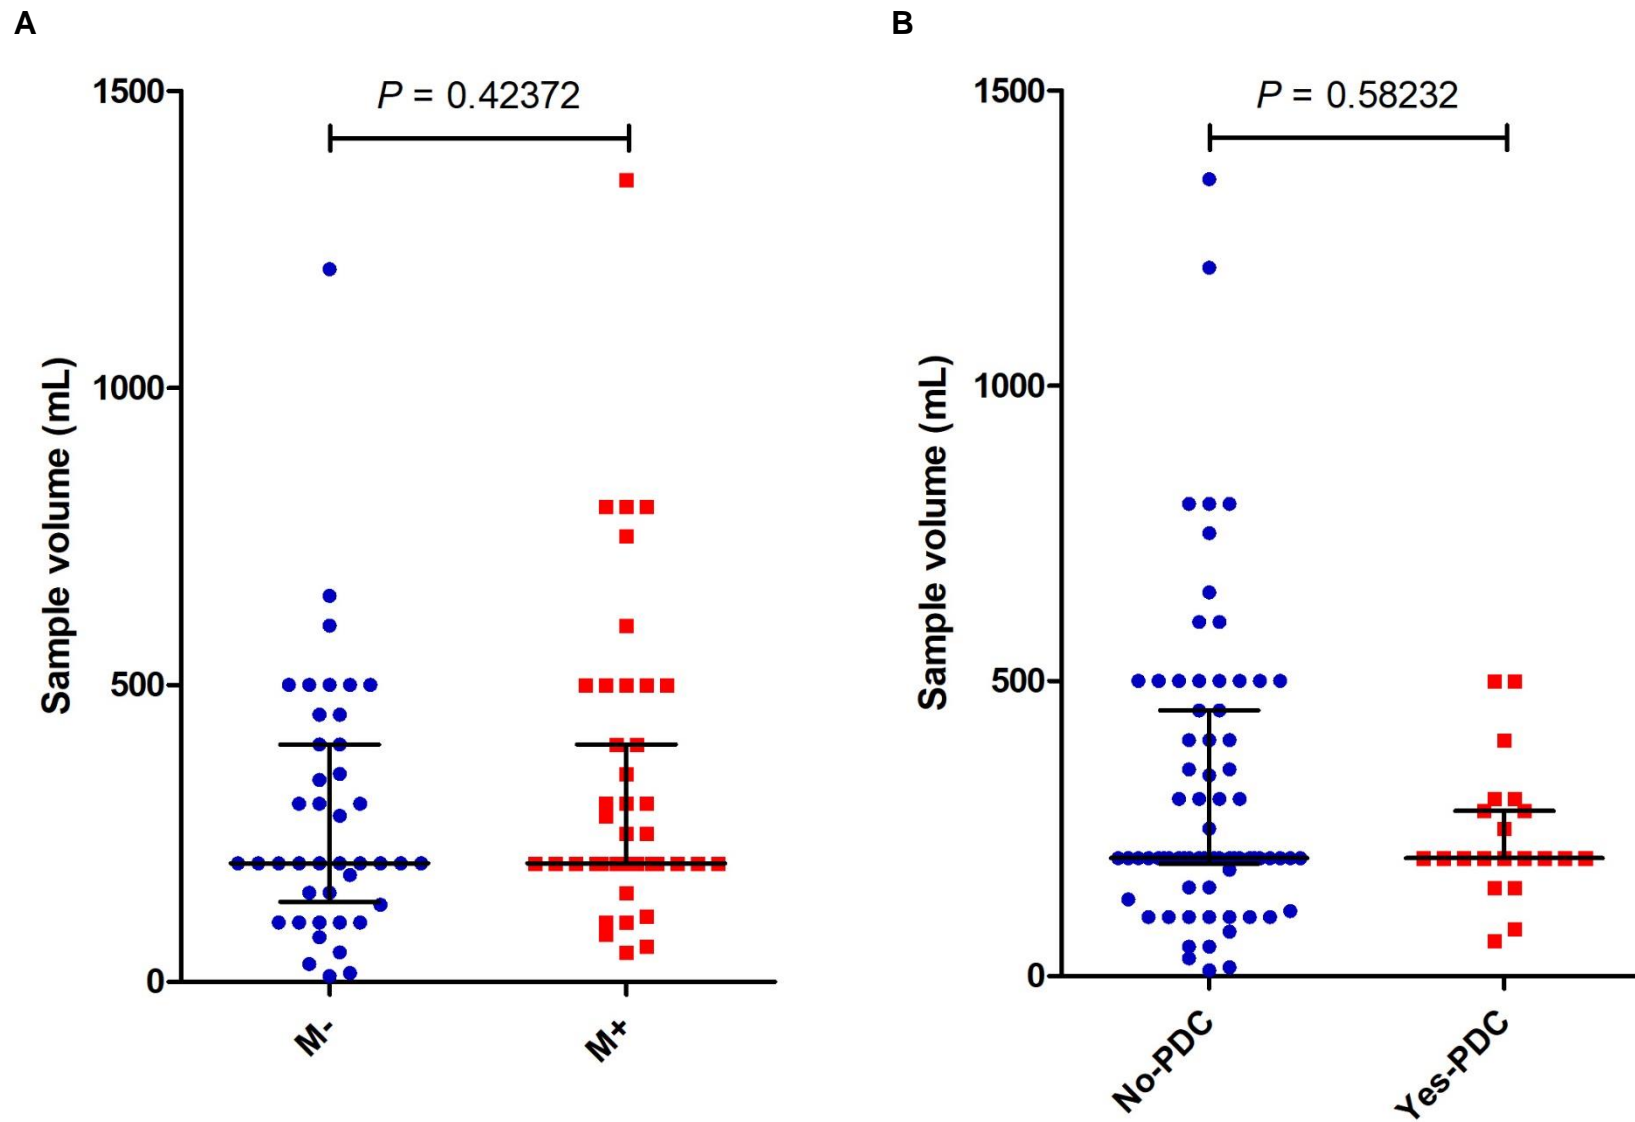

**Supplementary Figure 9. Sample volume of malignant effusions was not correlated with cytological diagnosis or PDC establishment.** (A) A graph showing sample volume and cytological diagnosis classification across 96 malignant effusions. Each dot represents a malignant effusion. P value was calculated using Mann-Whitney U test. (B) A graph showing sample volume and PDC establishment across 96 malignant effusions. Each dot represents a malignant effusion. P value was calculated using Mann-Whitney U test.

**Supplementary Table 1.** Fibroblast contamination in PDCs at early passages.

| Cell line ID | Cell line description      | Passage number at which flow cytometry analysis was performed | Fibroblast contamination assessed by flow cytometry analysis (%) |
|--------------|----------------------------|---------------------------------------------------------------|------------------------------------------------------------------|
| YU-1073      | Sample#23                  | 3                                                             | 9.36                                                             |
| YU-1074      | Sample#34                  | 8                                                             | 0                                                                |
| YU-1090      | Sample#49                  | 1                                                             | 9.27                                                             |
| YU-1094      | Sample#55                  | 2                                                             | 1.08                                                             |
| YU-1099      | Sample#94                  | 3                                                             | 1.17                                                             |
| YU-1152      | Sample#96                  | 5                                                             | 0                                                                |
| YU-1091      | Sample#66                  | 6                                                             | 3.94                                                             |
| YU-1088      | Sample#39                  | 1                                                             | 39.7                                                             |
| YU-1095      | Sample#59                  | 5                                                             | 2.14                                                             |
| YU-1096      | Sample#83                  | 4                                                             | 51.9                                                             |
| YU-1075      | Sample#27                  | 1                                                             | 5.8                                                              |
| YU-1077      | Sample#7                   | 4                                                             | 44.3                                                             |
| YU-1080      | Sample#33                  | 1                                                             | 2.11                                                             |
| YU-1081      | Sample#52                  | 1                                                             | 31.3                                                             |
| YU-1082      | Sample#62                  | 2                                                             | 1.93                                                             |
| YU-1083      | Sample#68                  | 1                                                             | 14.8                                                             |
| YU-1085      | Sample#90                  | 4                                                             | 0.88                                                             |
| HCC827       | Human NSCLC cell line      | N/A                                                           | 0.3                                                              |
| H2291        | Human NSCLC cell line      | N/A                                                           | 0.064                                                            |
| MRC-5        | Human fibroblast cell line | N/A                                                           | 98.8                                                             |

Flow cytometry analysis was performed on primary cultures that grew fast and had sufficient number of cells.

N/A, not available.

**Supplementary Table 2.** List of primers used in this study.

| Primer name         | Direction | Primer sequence                            |
|---------------------|-----------|--------------------------------------------|
| H-EGFR-Ex18_M13     | Forward   | GTAAACGACGGCCAGTAGGGCTGAGGTGACCCTTGT       |
| H-EGFR-Ex18_M13     | Reverse   | GCGGATAACAATTTACACAGGCCCCACCAGACCATGAGAG   |
| H-EGFR-Ex19_M13     | Forward   | GTAAACGACGGCCAGTACCATCTCACAATTGCCAGTTAAC   |
| H-EGFR-Ex19_M13     | Reverse   | GCGGATAACAATTTACACAGGGAGGTTTCAGAGCCATGGACC |
| H-EGFR-Ex20_M13     | Forward   | GTAAACGACGGCCAGTCATGTGCCCTCCTTCTGG         |
| H-EGFR-Ex20_M13     | Reverse   | GCGGATAACAATTTACACAGGTATCTCCCTCCCCGTATCTC  |
| H-EGFR-Ex21_M13     | Forward   | GTAAACGACGGCCAGTGAATTCGGATGCAGAGCTTCTTC    |
| H-EGFR-Ex21_M13     | Reverse   | GCGGATAACAATTTACACAGGATGCTGGCTGACCTAAAGCC  |
| H-ALK-F             | Forward   | CCT GAG TAC AAG CTG AGC AAG CT             |
| H-ALK-R1            | Reverse   | CAAATACTGACAGCCACAGGCAA                    |
| H-ALK-R2            | Reverse   | CGGTGTTGATTACATCCGGG                       |
| H-ALK-R3            | Reverse   | TGATTACATCCGGGTCCTGG                       |
| H-ALK-R4            | Reverse   | ACAAGTGGACCATATTCTATCGGC                   |
| H-SLC34A2-kinase-F  | Forward   | GGATTGGGAGATTGATTTTACTTCTC                 |
| H-SLC34A2-kinase-R  | Reverse   | TTCTGAATAACTGAAGTTGGTCCTG                  |
| H-TPM3-280F-62-1631 | Forward   | GGT GGC CTC CTT GAA CCG TA                 |
| H-TPM3-R-60-1631    | Reverse   | TCA CAT CGC CAT CTT CAC CT                 |
| H-CD74-409F-60-1789 | Forward   | GGC AAC ATG ACA GAG GAC CA                 |
| H-CD74-R-60-1789    | Reverse   | ACC CTT CTC GGT TCT TCG TT                 |

**Supplementary Table 3.** Cell passaging in PDCs.

| Cell line ID | Passage numbers used in testing after achieving high tumor purity | Maximum passage number achieved | Last passage number before culture was discontinued |
|--------------|-------------------------------------------------------------------|---------------------------------|-----------------------------------------------------|
| YU-1070      | 12 - 18                                                           | 22                              | 22                                                  |
| YU-1073      | 6 - 12                                                            | N/D                             | 27                                                  |
| YU-1074      | 8 - 10                                                            | 15                              | 15                                                  |
| YU-1090      | 12 - 17                                                           | N/D                             | 23                                                  |
| YU-1092      | 16 - 28                                                           | N/D                             | 28                                                  |
| YU-1093      | 17 - 19                                                           | N/D                             | 19                                                  |
| YU-1094      | 17 - 32                                                           | N/D                             | 40                                                  |
| YU-1099      | 12 - 38                                                           | N/D                             | 40                                                  |
| YU-1152      | 5 - 25                                                            | N/D                             | 35                                                  |
| YU-1091      | 7 - 11                                                            | 11                              | 11                                                  |
| YU-1088      | 33 - 34                                                           | N/D                             | 36                                                  |
| YU-1089      | 13 - 26                                                           | N/D                             | 51                                                  |
| YU-1095      | 16 - 25                                                           | N/D                             | 37                                                  |
| YU-1096      | 6 - 19                                                            | N/D                             | 20                                                  |
| YU-1097      | 14 - 33                                                           | N/D                             | 34                                                  |
| YU-1075      | 3 - 10                                                            | 10                              | 10                                                  |
| YU-1076      | 10 - 28                                                           | N/D                             | 35                                                  |
| YU-1077      | 11 - 23                                                           | N/D                             | 35                                                  |
| YU-1080      | 1 - 13                                                            | 13                              | 13                                                  |
| YU-1081      | 12 - 20                                                           | N/D                             | 24                                                  |
| YU-1082      | 10 - 24                                                           | N/D                             | 44                                                  |
| YU-1083      | 15 - 33                                                           | N/D                             | 33                                                  |
| YU-1085      | 12 - 24                                                           | N/D                             | 31                                                  |

N/D, not determined.

**Supplementary Table 4.** Clinical annotations and characteristics of established PDCs.

| Cell line ID         | Clinical annotations               |                                |                               |                                                             |                                                            | PDC characteristics               |     |
|----------------------|------------------------------------|--------------------------------|-------------------------------|-------------------------------------------------------------|------------------------------------------------------------|-----------------------------------|-----|
|                      | Patient treatment response to TKIs |                                |                               | Known patient tumor mutation <sup>a</sup>                   |                                                            | Driver mutation <sup>d</sup>      | WES |
|                      | Prior TKI therapy                  | Best response to the prior TKI | PFS on the prior TKI (Months) | Driver mutation before disease progression to the prior TKI | Driver mutation after disease progression to the prior TKI |                                   |     |
| YU-1070              | N/A                                | N/A                            | N/A                           | N/A                                                         | N/A                                                        | BRAF K601E                        | Yes |
| YU-1073              | Gefitinib                          | PR                             | 7.0                           | N/A                                                         | EGFR L858R/T790M                                           | EGFR L858R/T790M                  | No  |
| YU-1074              | Gefitinib                          | PD                             | 1.0                           | EGFR exon 20 insertion                                      | N/A                                                        | EGFR D770_N771insG                | No  |
| YU-1090 <sup>h</sup> | Gefitinib                          | PR                             | 18.2                          | EGFR L858R                                                  | EGFR L858R/T790M                                           | EGFR L858R/T790M                  | No  |
| YU-1092              | Gefitinib                          | PD                             | 1.9                           | EGFR L861Q                                                  | N/A                                                        | EGFR L861Q                        | No  |
| YU-1093              | Erlotinib                          | PD                             | 1.8                           | EGFR exon 19 deletion                                       | EGFR exon 19 deletion                                      | EGFR exon 19 deletion             | No  |
| YU-1094              | Gefitinib                          | PR                             | 14.8                          | EGFR L858R                                                  | EGFR L858R                                                 | EGFR L858R                        | Yes |
| YU-1099              | Gefitinib                          | PR                             | 13.6                          | EGFR G719X/S768I                                            | EGFR G719X/S768I                                           | EGFR G719C/S768I                  | No  |
| YU-1152              | Erlotinib                          | PD                             | 1.4                           | EGFR L858R                                                  | EGFR L858R                                                 | EGFR L858R                        | No  |
| YU-1091              | Afatinib + Ruxolitinib             | SD                             | 3.2                           | EGFR L858R                                                  | EGFR L858R                                                 | EGFR L858R                        | No  |
| YU-1088 <sup>i</sup> | Osimertinib                        | PR                             | 21.3                          | EGFR exon 19 deletion                                       | EGFR exon 19 deletion                                      | EGFR exon 19 deletion             | Yes |
| YU-1089              | Olmotinib                          | PR                             | 7.6                           | EGFR exon 19 deletion/T790M                                 | EGFR exon 19 deletion                                      | EGFR exon 19 deletion             | Yes |
| YU-1095 <sup>j</sup> | Osimertinib                        | PR                             | 21.3                          | EGFR exon 19 deletion                                       | EGFR exon 19 deletion                                      | EGFR exon 19 deletion             | Yes |
| YU-1096 <sup>h</sup> | Osimertinib                        | PR                             | 8.8                           | EGFR L858R/T790M                                            | N/A                                                        | EGFR L858R                        | Yes |
| YU-1097              | Osimertinib                        | PR                             | 38.7                          | EGFR exon 19 deletion                                       | N/A                                                        | EGFR exon 19 deletion/T790M/C797S | Yes |
| YU-1075 <sup>j</sup> | Crizotinib                         | PD                             | 1.9                           | ALK fusion <sup>b</sup>                                     | N/A                                                        | EML4-ALK                          | No  |
| YU-1076 <sup>j</sup> | Ceritinib                          | NE <sup>e</sup>                | NE                            | ALK fusion <sup>b</sup>                                     | N/A                                                        | EML4-ALK                          | No  |
| YU-1077              | Alectinib                          | PR                             | 17.7                          | ALK fusion <sup>b</sup>                                     | N/A                                                        | EML4-ALK G1202R                   | No  |
| YU-1080              | N/A                                | N/A                            | N/A                           | ROS1 fusion <sup>c</sup>                                    | N/A                                                        | CD74-ROS1                         | No  |
| YU-1081              | Crizotinib                         | NE <sup>f</sup>                | 0.3                           | ROS1 fusion <sup>c</sup>                                    | N/A                                                        | TPM3-ROS1                         | No  |
| YU-1082 <sup>k</sup> | N/A                                | N/A                            | N/A                           | ROS1 fusion <sup>b</sup>                                    | N/A                                                        | SLC34A2-ROS1                      | No  |
| YU-1083 <sup>k</sup> | N/A                                | N/A                            | N/A                           | ROS1 fusion <sup>b</sup>                                    | N/A                                                        | SLC34A2-ROS1                      | No  |
| YU-1085 <sup>k</sup> | Crizotinib                         | PR                             | 4.2                           | ROS1 fusion <sup>b</sup>                                    | N/A                                                        | SLC34A2-ROS1                      | No  |

<sup>a</sup>Known patient tumor mutations were detected using PANAMutyper™R.

<sup>b</sup>Gene fusions were detected using FISH.

<sup>c</sup>Gene fusions were detected using IHC.

<sup>d</sup>Driver mutations were detected using direct sequencing.

<sup>e</sup>Treatment was discontinued because the patient developed nausea.

<sup>f</sup>Not evaluable due to sudden death of the patient.

<sup>g</sup>Treatment was discontinued because cardiac toxicity was observed in the patient.

<sup>h,i,j,k</sup>Models with identical footnotes were established from a same patient.

TKI, tyrosine kinase inhibitor; FISH, fluorescence in situ hybridization; IHC, immuno-histochemistry; PFS, progression-free survival; N/A, not available; PR, partial response; PD, progressive disease; SD, stable disease; NE, not evaluable.

**Supplementary Table 5.** List of drugs and their targets used for the drug screening in YU-1089 cells.

| Drug name   | Main target    | Combination index calculated by the Bliss Independence model |
|-------------|----------------|--------------------------------------------------------------|
| Gefitinib   | EGFR           | 1.162106                                                     |
| WZ8040      | EGFR           | 1.3012                                                       |
| Pelitinib   | EGFR           | 1.139715                                                     |
| Dacomitinib | EGFR           | 1.262566                                                     |
| Afatinib    | EGFR/HER       | 1.098068                                                     |
| AZD8931     | EGFR/HER       | 1.196515                                                     |
| Irbinitinib | HER            | 1.041432                                                     |
| TAE684      | ALK            | 0.950957                                                     |
| Alectinib   | ALK            | 0.973796                                                     |
| Linsitinib  | IGF-1R         | 0.84943                                                      |
| GSK1904529A | IGF-1R         | 1.037405                                                     |
| AMG-208     | c-Met          | 1.007102                                                     |
| NVP-BVU972  | c-Met          | 0.981581                                                     |
| PD173074    | FGFR           | 0.872689                                                     |
| BGJ398      | FGFR           | 0.963166                                                     |
| AZD4547     | FGFR           | 0.974947                                                     |
| Dovitinib   | FGFR           | 0.926927                                                     |
| PLX-4720    | BRAF           | 1.017424                                                     |
| Vemurafenib | BRAF           | 1.013732                                                     |
| AZD6244     | MEK            | 0.913459                                                     |
| GSK1120212  | MEK            | 1.035658                                                     |
| SB 203580   | p38 MAPK       | 1.16491                                                      |
| LY2228820   | p38 MAPK       | 1.171036                                                     |
| Ruxolitinib | JAK            | 0.982608                                                     |
| LY2784544   | JAK            | 0.887484                                                     |
| Tofacitinib | JAK            | 0.959943                                                     |
| Cyt387      | JAK            | 0.969702                                                     |
| AZD7762     | Chk1           | 1.00908                                                      |
| LY2603618   | Chk1           | 1.048574                                                     |
| SP600125    | JNK            | 1.02319                                                      |
| MK-2206     | Akt            | 0.899676                                                     |
| GSK690693   | Akt            | 0.894215                                                     |
| GDC-0068    | Akt            | 0.93057                                                      |
| Everolimus  | mTOR           | 0.990837                                                     |
| Rapamycin   | mTOR           | 1.055047                                                     |
| BEZ235      | mTOR/PI3K      | 0.973725                                                     |
| GDC-0941    | PI3K           | 0.871631                                                     |
| Buparlisib  | PI3K           | 0.945083                                                     |
| Alpilisib   | PI3            | 1.005288                                                     |
| AS-252424   | PI3K           | 0.933785                                                     |
| NU7441      | DNA-PK         | 0.991935                                                     |
| SB 216763   | GSK-3          | 0.991884                                                     |
| TWS119      | GSK-3          | 1.143602                                                     |
| CHIR-98014  | GSK-3          | 0.990869                                                     |
| Nilotinib   | Bcr-Abl        | 0.979982                                                     |
| WP1130      | Bcr-Abl        | 0.918926                                                     |
| KX2-391     | Src            | 0.984188                                                     |
| Saracatinib | Src            | 0.871408                                                     |
| SB 431542   | TGFBRI         | 0.981205                                                     |
| SB 525334   | TGFBRI         | 1.091                                                        |
| LDN193189   | TGFBRI         | 1.001958                                                     |
| PF-00562271 | FAK            | 1.029833                                                     |
| NVP-TAE226  | FAK            | 1.09241                                                      |
| Apatinib    | VEGFR2         | 1.022297                                                     |
| SAR131675   | VEGFR3         | 0.949532                                                     |
| BIBF1120    | Multikinase    | 0.843265                                                     |
| Regorafenib | Multikinase    | 1.108762                                                     |
| OSI-930     | Multikinase    | 1.042681                                                     |
| Tozasertib  | Aurora A       | 0.83032                                                      |
| ZM-447439   | Aurora A/B     | 1.000903                                                     |
| Barasertib  | Aurora B       | 0.857202                                                     |
| SNS-314     | Aurora A/B/C   | 0.858689                                                     |
| AMG 900     | Aurora A/B/C   | 0.906578                                                     |
| Palbociclib | CDK4/6         | 1.25205                                                      |
| SNS-032     | CDK2           | 1.028809                                                     |
| PHA-793887  | CDK2/CDK5/CDK7 | 1.210334                                                     |
| AZD5438     | CDK1/2/9       | 1.052975                                                     |
| CP 673451   | PDGFRa/b       | 1.14203                                                      |
| Crenolanib  | PDGFRa/b       | 1.067407                                                     |
| BI 2536     | Plk1           | 1.009857                                                     |

|                       |                                            |          |
|-----------------------|--------------------------------------------|----------|
| BI6727                | Plk1                                       | 1.019603 |
| Fosmatinib            | Syk                                        | 0.992662 |
| IMD 0354              | IKK $\beta$                                | 0.887166 |
| TPCA-1                | IKK $\beta$                                | 0.97044  |
| KU-60019              | ATM                                        | 1.027319 |
| Staurosporine         | PKC $\alpha$ , PKC $\gamma$ and PKC $\eta$ | 1.016615 |
| BX-912                | PDK1                                       | 0.929528 |
| Tie2 kinase inhibitor | Tie2                                       | 1.034664 |
| Y-27632               | ROCK                                       | 0.942434 |

Combination index value of each drug and olmutinib is shown.
